# Supplementary material for: Burden of disease in adults admitted to hospital in a rural region of coastal Kenya: an analysis of data from linked clinical and demographic surveillance systems
Source: PubMed Central journal article supplement — Lancet Glob Health. 2014 Apr 27;2(4):e216–24. doi: 10.1016/S2214-109X(14)70023-3 (PMC3986034; doi:10.1016/s2214-109x(14)70023-3), 2014-04-27
Supplement: mmc1.pdf [file mmc1.pdf]

## Supplementary appendix

This appendix formed part of the original submission and has been peer reviewed. We post it as supplied by the authors.

Supplement to: Etyang AO, Munge K, Bunyasi EW. Burden of disease in adults admitted to hospital in a rural region of coastal Kenya: an analysis of data from linked clinical and demographic surveillance systems. *Lancet Glob Health* 2014; **2**: e216–24.

## **SUPPLEMENTARY APPENDIX**

### **Burden of disease in adults admitted to hospital in a rural region of coastal Kenya: an analysis of data from linked clinical and demographic surveillance systems**

Anthony O. Etyang<sup>1,2</sup>, Kenneth Munge<sup>1,2</sup>, Erick W. Bunyasi<sup>1,2</sup>, Lena Matata<sup>1,2</sup>,  
Carolyne Ndila<sup>1</sup>, Sailoki Kapesa<sup>1,2</sup>, Maureen Owiti<sup>2</sup>, Iqbal Khandawalla<sup>2</sup>,  
Andrew J. Brent<sup>1,2,4,7</sup>, Benjamin Tsofa<sup>1,2</sup>, Pamela Kabibu<sup>2</sup>, Susan Morpeth<sup>1,2,4</sup>,  
Evasius Bauni<sup>1,5</sup>, Mark Otiende<sup>1</sup>, John Ojal<sup>1</sup>, Philip Ayieko<sup>1</sup>, Maria D. Knoll<sup>6</sup>,  
Liam Smeeth<sup>3</sup>, Thomas N. Williams<sup>1,2,5,7</sup>, Ulla K. Griffiths<sup>3</sup>, J. Anthony G.  
Scott<sup>1,2,3,4,5</sup>

#### **Institutions**

1. KEMRI-Wellcome Trust Research Programme, Kilifi, Kenya
2. Kilifi District Hospital, Kilifi, Kenya
3. London School of Hygiene and Tropical Medicine, London, UK
4. Nuffield Department of Medicine, University of Oxford, Oxford, UK
5. INDEPTH Network, Accra, Ghana
6. Johns Hopkins Bloomberg School of Public Health, Baltimore, USA
7. Imperial College, London, UK

## **Table of Contents**

Figure 1: Age standardized KHDSS death rates by distance from Kilifi District Hospital- Page 3

Figure 2 (A-P): Admission Rates for ICD Categories by Distance to KDH Table 1: Age Specific Hospitalization Rates for all KHDSS residents- Pages 4-11

Table 1: Age Specific Hospitalization Rates for all KHDSS residents- Page 12

Table 2: Admission rates by ICD code for individuals living within 5km of Kilifi District Hospital- Page 13-17

Table 3: Disability Adjusted Life Years (DALY) in the KHDSS for the 15 leading causes of admission to KDH- Page18

Figure 1: Age standardized KHDSS death rates by distance from Kilifi District Hospital

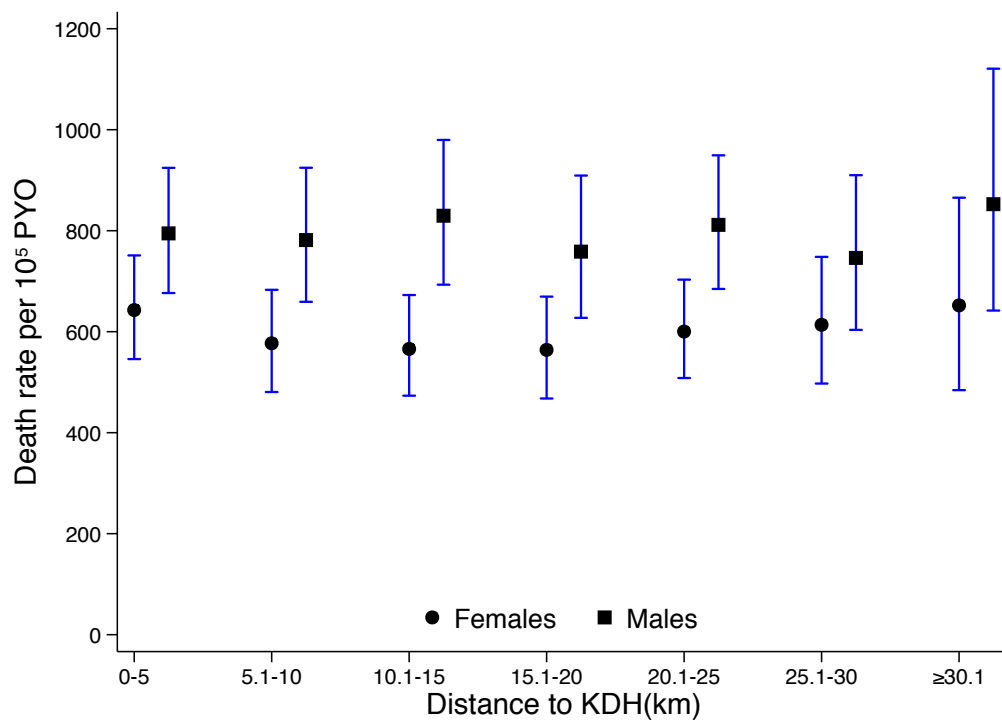

\* Rates are per 100,000 Person Years of Observation (PYO) and are age-standardized

Figure 2: Admission Rates for ICD Categories by Distance to KDH

A. Blood disorders

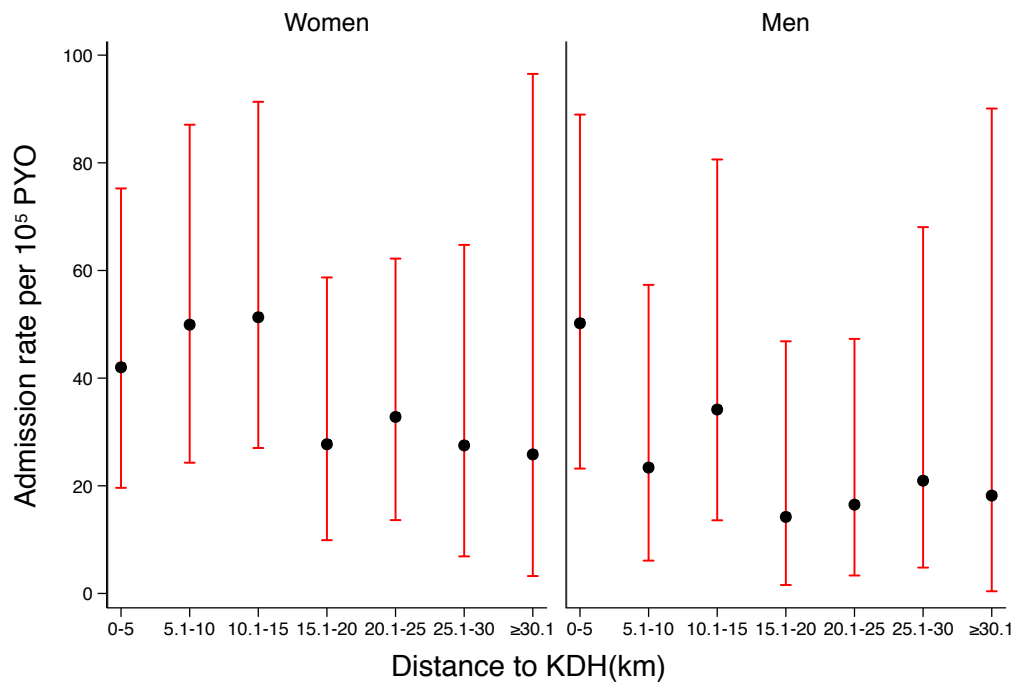

B. Circulatory disorders

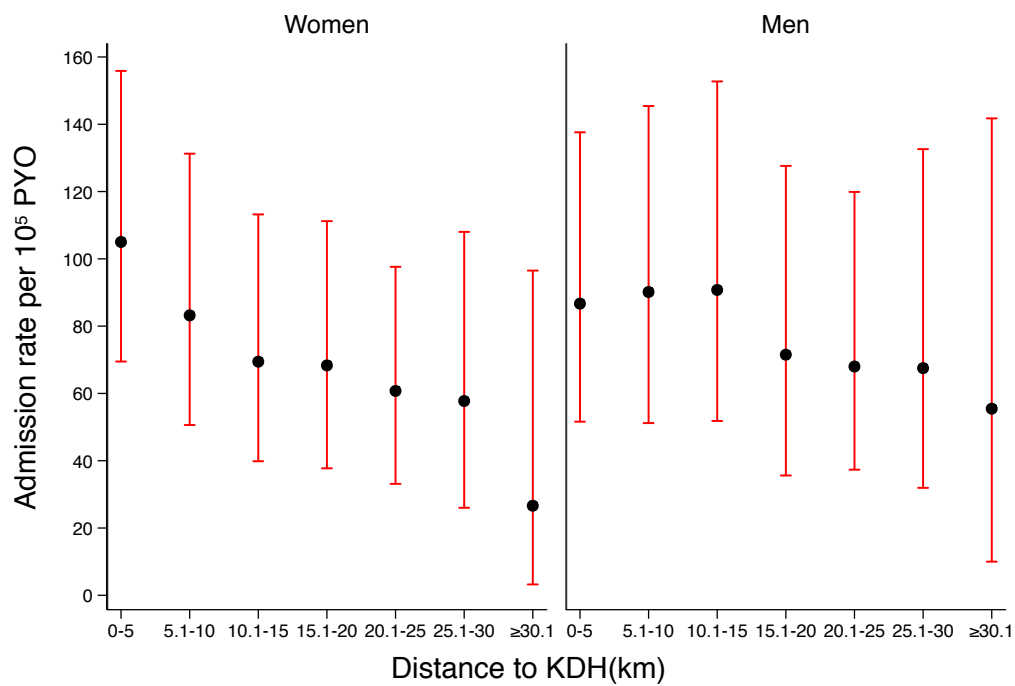

\* Rates are per 100,000 Person Years of Observation (PYO) and are age-standardized

Figure 2: Admission Rates for ICD Categories by Distance to KDH

C. Digestive System

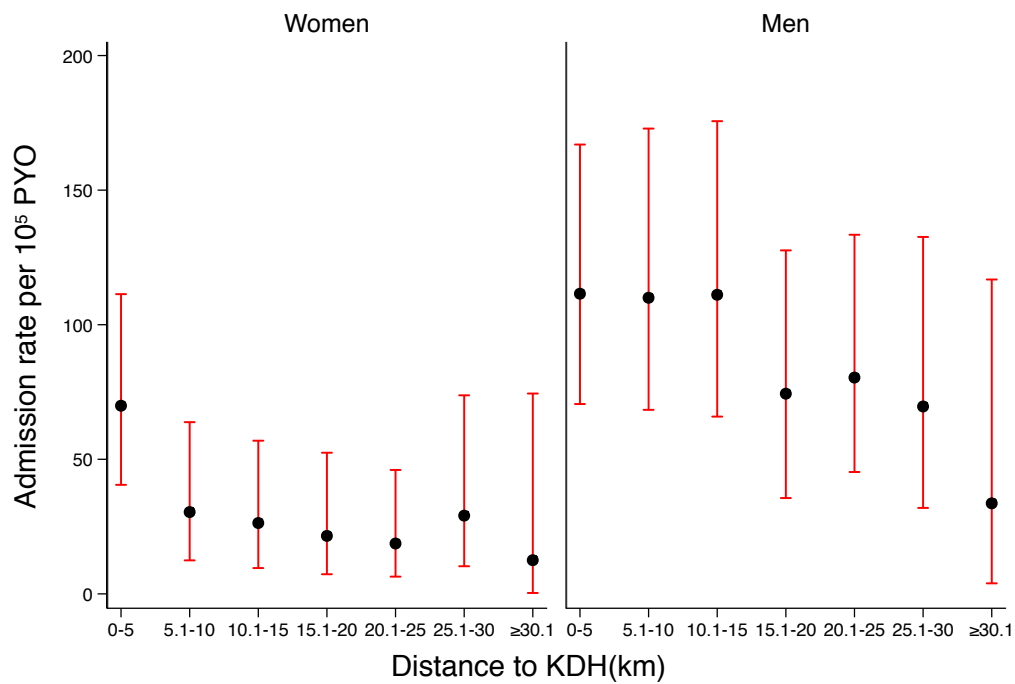

D. Endocrine

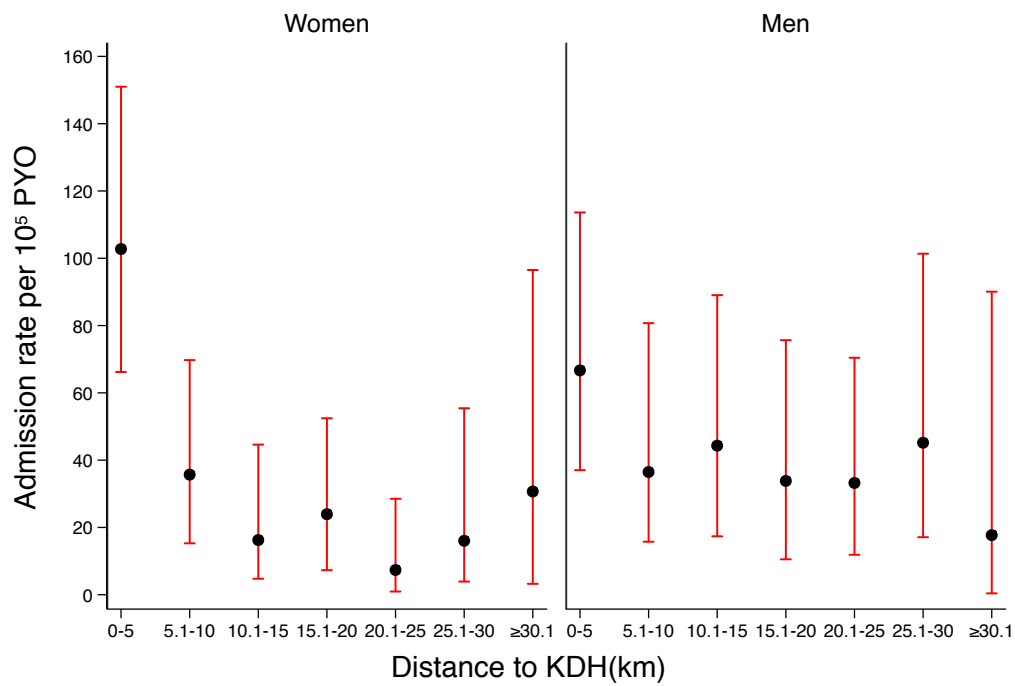

\* Rates are per 100,000 Person Years of Observation (PYO) and are age-standardized

Figure 2: Admission Rates for ICD Categories by Distance to KDH

E. Genitourinary System

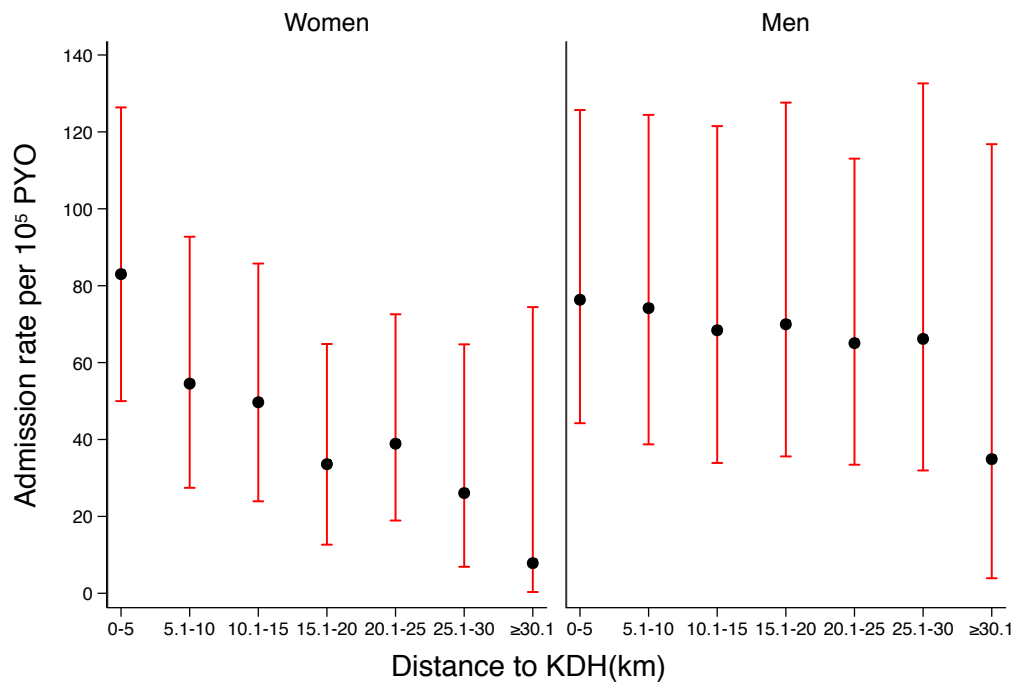

F. Infectious and Parasitic Diseases

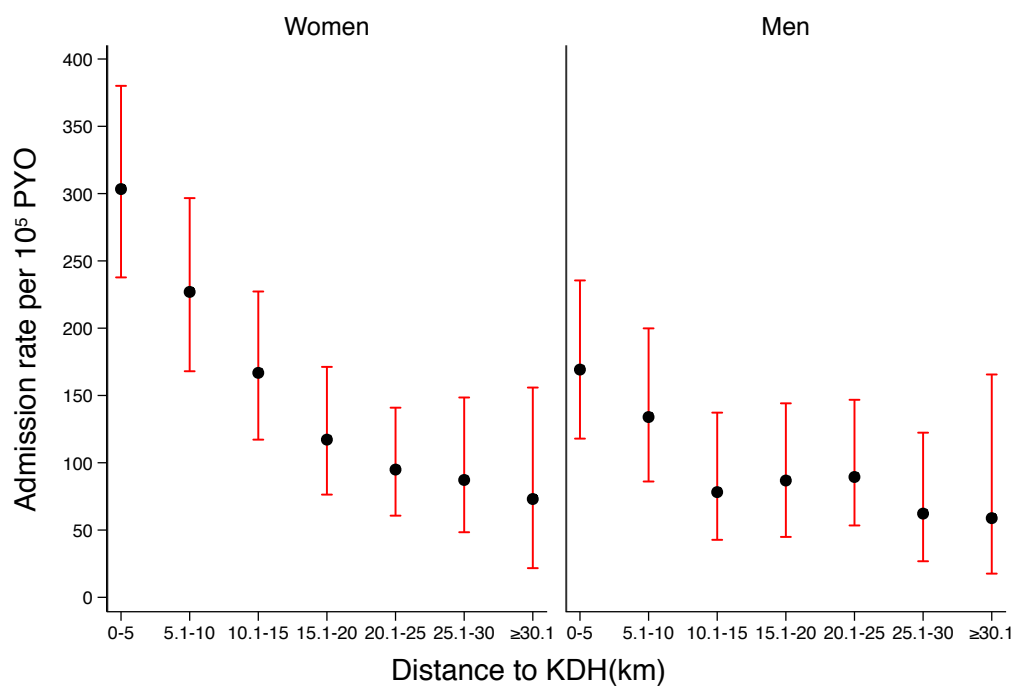

\* Rates are per 100,000 Person Years of Observation (PYO) and are age-standardized

Figure 2: Admission Rates for ICD Categories by Distance to KDH

G. Injuries

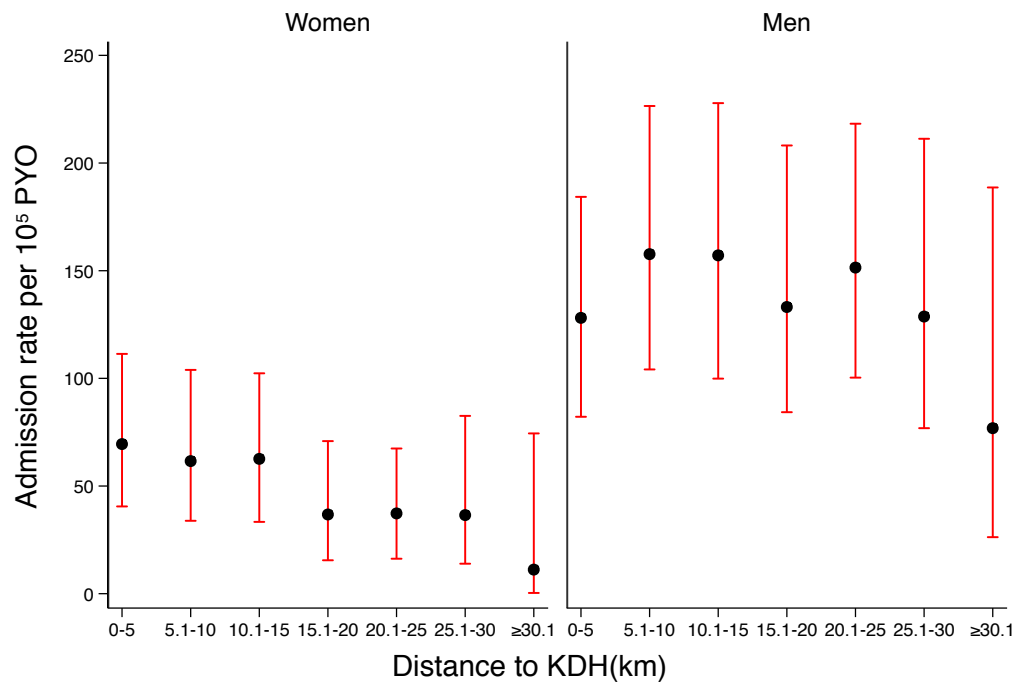

H. Musculoskeletal

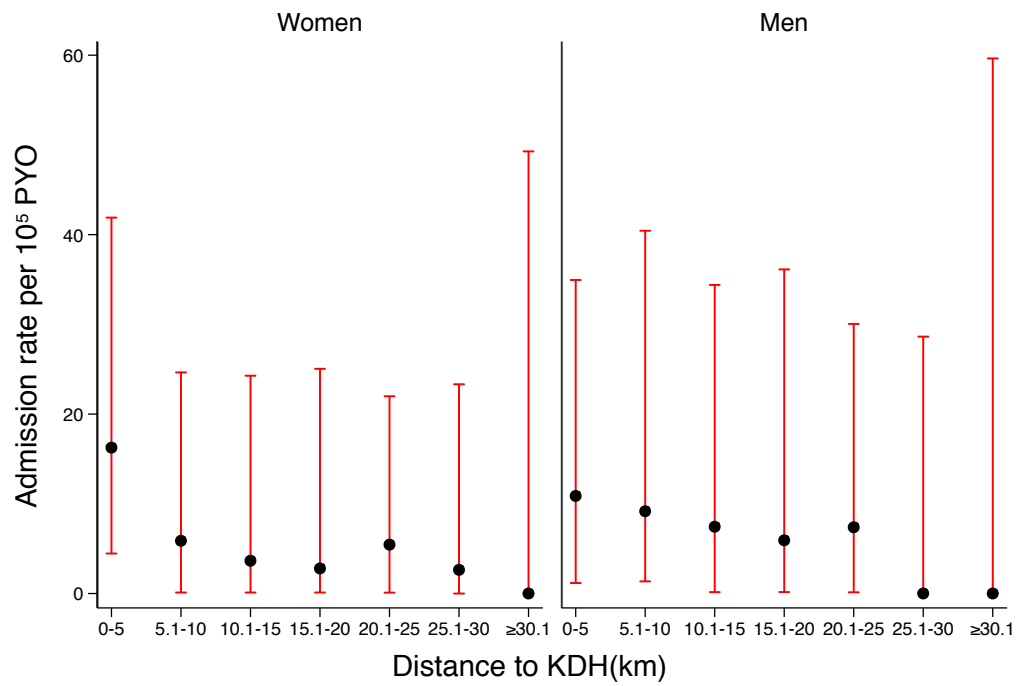

\* Rates are per 100,000 Person Years of Observation (PYO) and are age-standardized



Figure 2: Admission Rates for ICD Categories by Distance to KDH

I. Mental Disorders

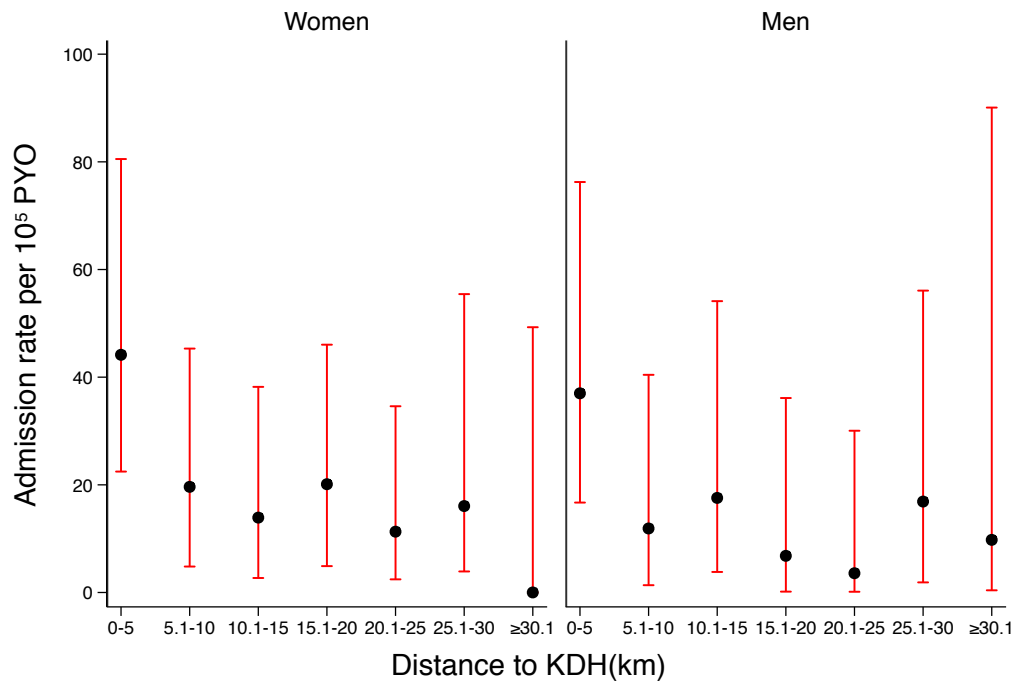

J. Neoplastic Disorders

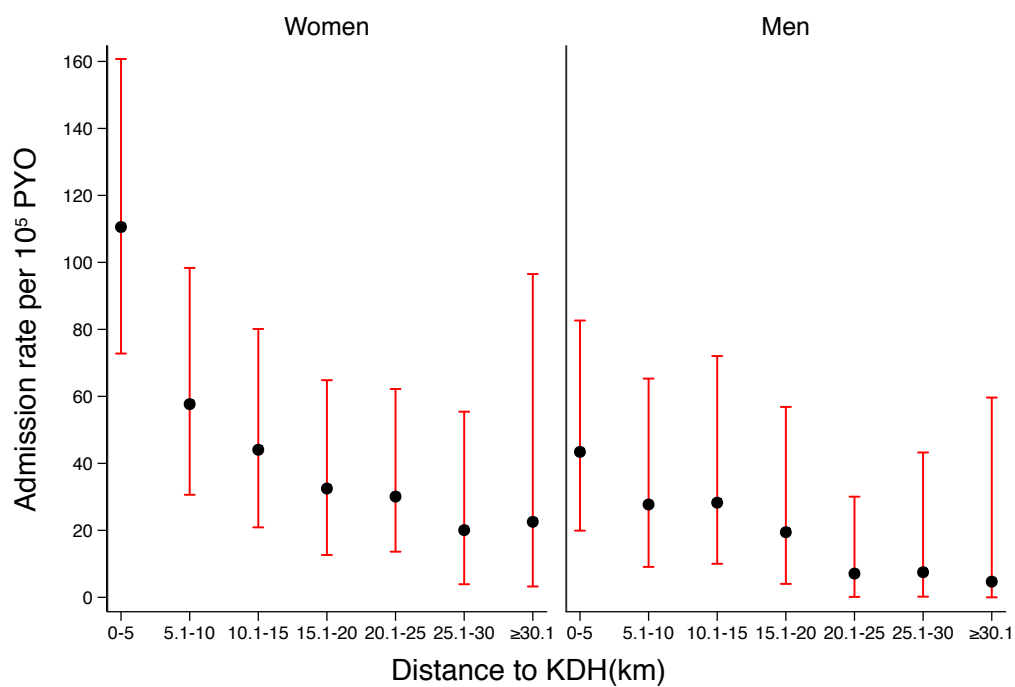

\* Rates are per 100,000 Person Years of Observation (PYO) and are age-standardized

Figure 2: Admission Rates for ICD Categories by Distance to KDH

K. Nervous System Disorders

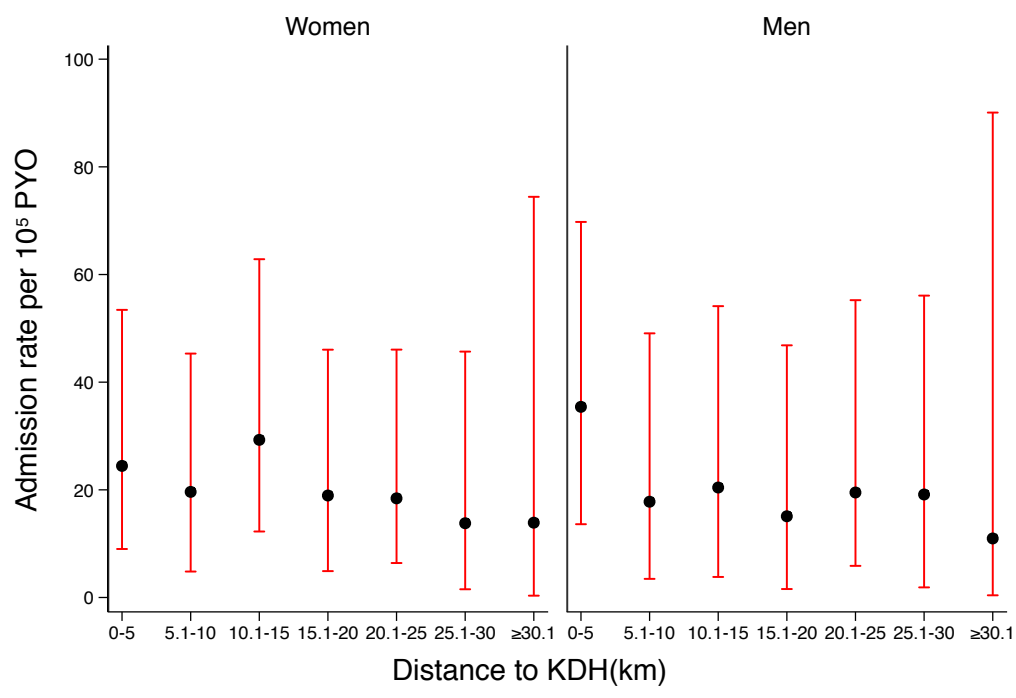

L. Poisoning by External Agents

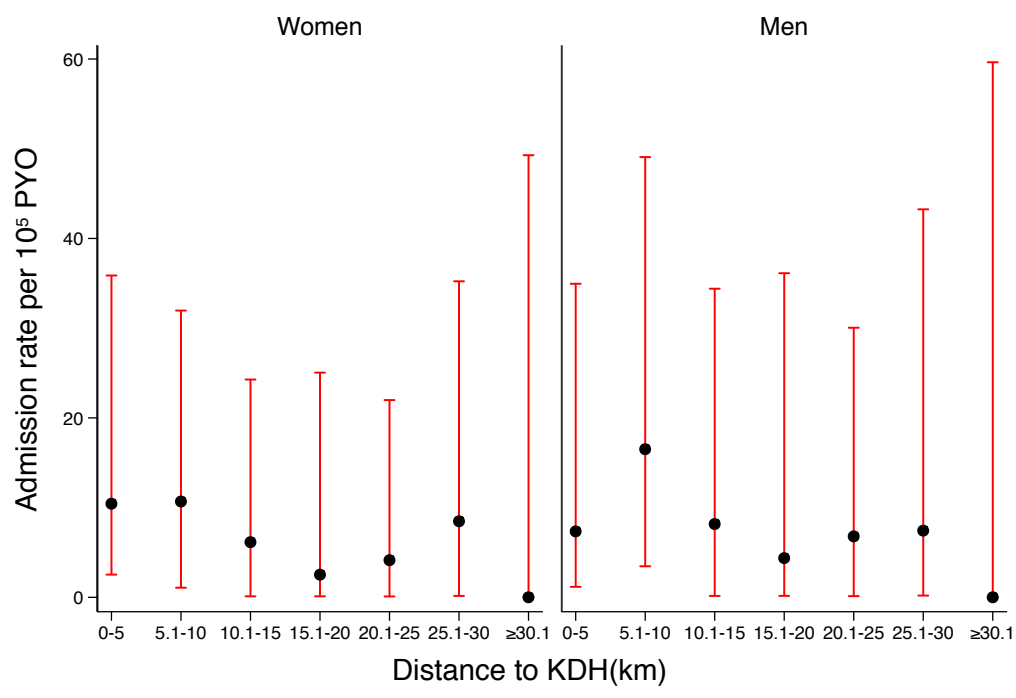

\* Rates are per 100,000 Person Years of Observation (PYO) and are age-standardized

Figure 2: Admission Rates for ICD Categories by Distance to KDH

M. Pregnancy Related Disorders

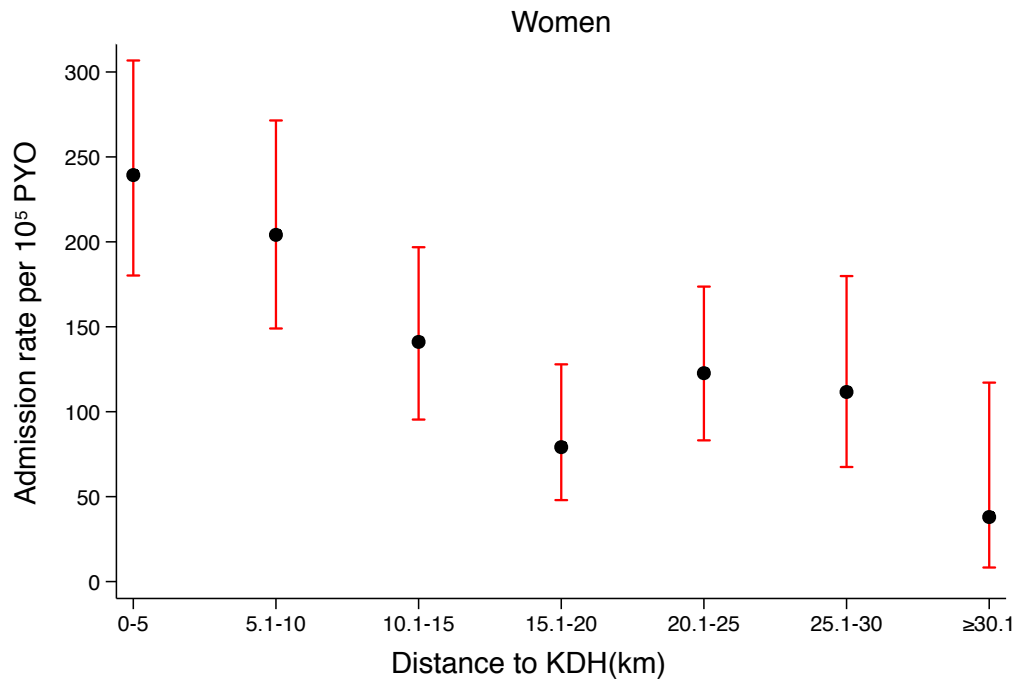

N. Respiratory System Disorders

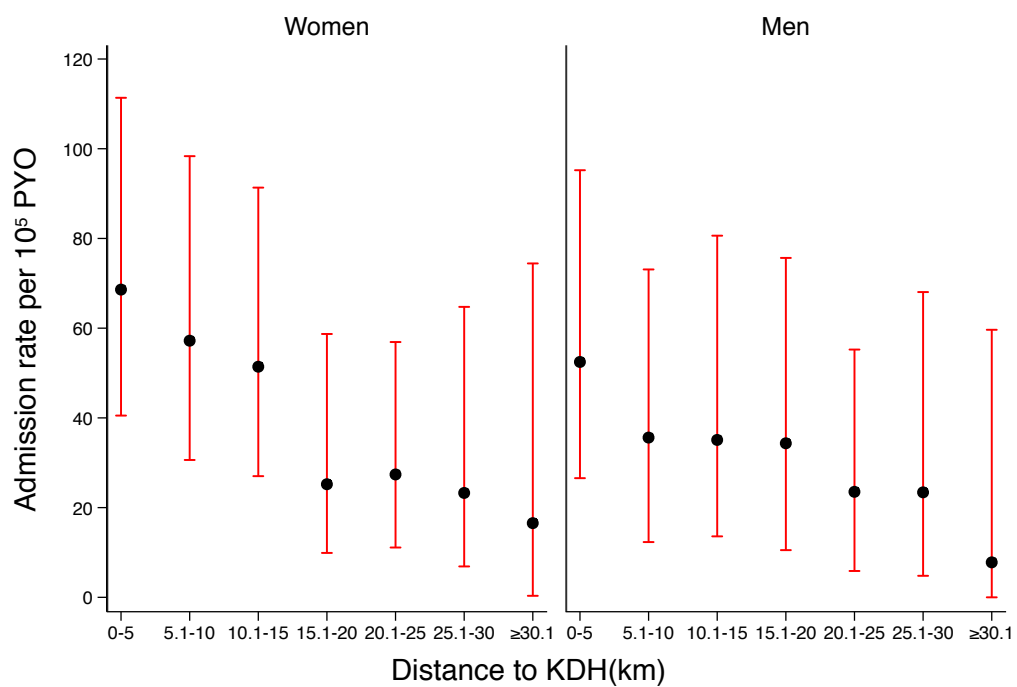

\* Rates are per 100,000 Person Years of Observation (PYO) and are age-standardized

Figure 2: Admission Rates for ICD Categories by Distance to KDH

O. Signs and Symptoms Not Elsewhere Classified

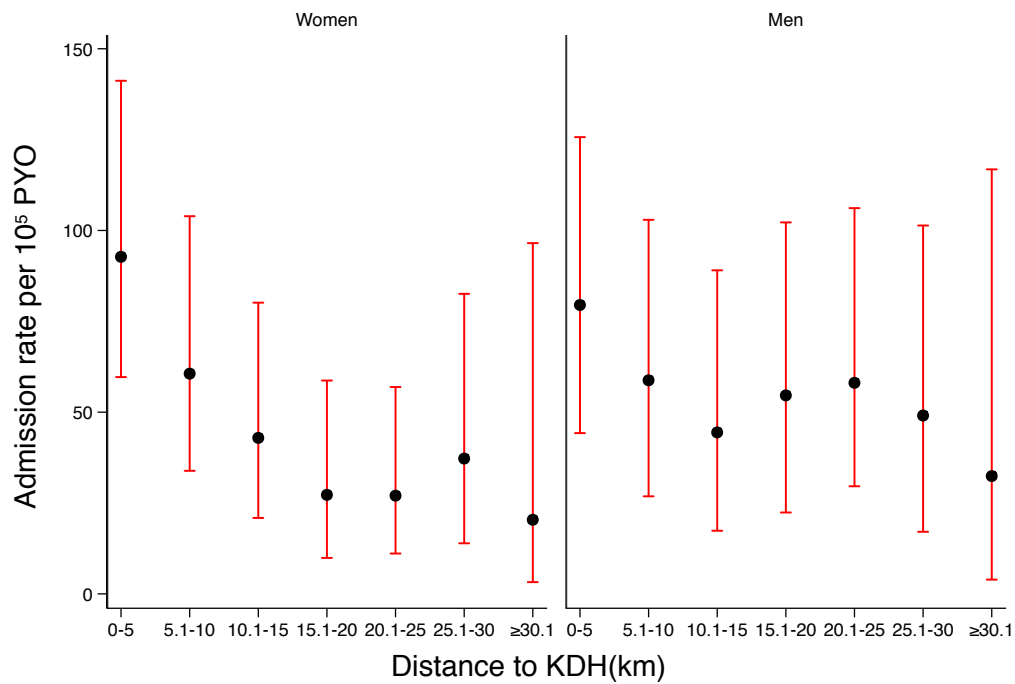

P. Skin Disorders

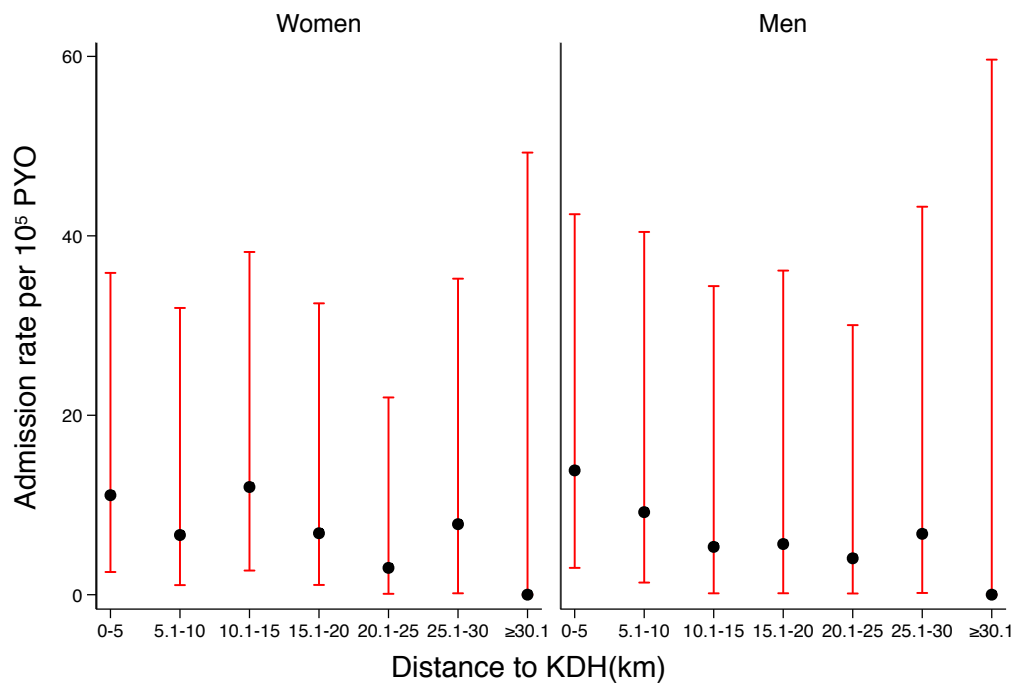

\* Rates are per 100,000 Person Years of Observation (PYO) and are age-standardized

Supplementary Table: Age Specific Hospitalization Rates for all KHDSS residents

| Age Group (years)                         | Women    |         |          |         |          |         |          |          | Men      |         |          |         |          |         |          |          |
|-------------------------------------------|----------|---------|----------|---------|----------|---------|----------|----------|----------|---------|----------|---------|----------|---------|----------|----------|
|                                           | 15-34    |         | 35-54    |         | 55-74    |         | >75      |          | 15-34    |         | 35-54    |         | 55-74    |         | >75      |          |
| ICD Category                              | Adm rate | 95% CI   | Adm rate | 95% CI  | Adm rate | 95% CI  | Adm rate | 95% CI  | Adm rate | 95% CI   |
| Blood disorders                           | 55       | 46-65   | 51       | 39-65   | 69       | 49-95   | 104      | 50-190   | 24       | 18-32   | 31       | 20-46   | 66       | 43-98   | 183      | 100-306  |
| Circulatory                               | 10       | 6-14    | 62       | 48-77   | 354      | 305-408 | 942      | 759-1157 | 7        | 4-12    | 71       | 53-92   | 362      | 304-428 | 1135     | 909-1399 |
| Digestive                                 | 40       | 33-49   | 55       | 42-70   | 60       | 41-85   | 93       | 43-177   | 44       | 35-54   | 165      | 138-196 | 304      | 251-365 | 391      | 264-558  |
| Endocrine                                 | 13       | 9-18    | 39       | 29-52   | 137      | 107-172 | 207      | 126-320  | 17       | 11-23   | 55       | 40-74   | 185      | 144-234 | 209      | 0-0      |
| Genitourinary                             | 65       | 55-76   | 96       | 80-116  | 51       | 33-73   | 21       | 3-75     | 14       | 9-20    | 67       | 50-87   | 346      | 289-411 | 717      | 540-934  |
| Infectious and parasitic                  | 176      | 160-194 | 333      | 301-368 | 284      | 241-333 | 425      | 305-576  | 85       | 73-99   | 232      | 199-268 | 211      | 168-263 | 326      | 211-481  |
| Injuries                                  | 51       | 43-61   | 76       | 62-94   | 112      | 86-145  | 228      | 143-345  | 168      | 150-187 | 232      | 199-268 | 214      | 170-266 | 574      | 417-770  |
| Mental disorders                          | 40       | 32-48   | 26       | 18-37   | 15       | 6-29    | 0        | 0-0      | 32       | 24-41   | 23       | 13-36   | 8        | 2-23    | 0        | 0-0      |
| Musculoskeletal                           | 3        | 1-6     | 17       | 10-26   | 15       | 6-29    | 31       | 6-91     | 9        | 5-14    | 5        | 1-13    | 11       | 3-27    | 117      | 54-223   |
| Neoplasms                                 | 27       | 21-35   | 119      | 100-140 | 133      | 104-168 | 104      | 50-190   | 5        | 2-9     | 25       | 15-39   | 95       | 67-132  | 170      | 90-290   |
| Nervous system                            | 22       | 16-28   | 29       | 20-40   | 51       | 33-73   | 93       | 43-177   | 28       | 21-36   | 26       | 16-40   | 48       | 28-75   | 13       | 0-73     |
| Poisoning                                 | 14       | 10-20   | 8        | 4-15    | 2        | 0-10    | 0        | 0-0      | 14       | 9-20    | 11       | 5-22    | 5        | 1-19    | 0        | 0-0      |
| Pregnancy disorders                       | 317      | 295-340 | 204      | 179-231 | 7        | 2-19    | 0        | 0-0      | N/A      |         | N/A      |         | N/A      |         | N/A      |          |
| Respiratory system                        | 32       | 25-40   | 55       | 42-70   | 135      | 105-170 | 186      | 110-295  | 19       | 13-26   | 42       | 29-58   | 114      | 82-153  | 248      | 149-387  |
| Skin and subcutaneous                     | 6        | 3-10    | 19       | 12-29   | 13       | 5-27    | 21       | 3-75     | 5        | 2-9     | 6        | 2-15    | 26       | 13-49   | 26       | 3-94     |
| Symptoms & signs not elsewhere classified | 29       | 23-37   | 63       | 50-79   | 138      | 109-174 | 476      | 349-635  | 25       | 18-33   | 86       | 67-109  | 206      | 163-257 | 430      | 296-604  |

Rates are per 100,000 person years of observation (PYO) in the KHDSS

PYOs were as follows: **15-34yrs** F: 258,615 M: 216,124 **35-54** F: 122,152 M: 84,458 **55-74** F: 53,507 M: 38,475 **≥75** F: 9,689 M: 7,615

**Supplementary Table 2: Admission rates by ICD code for individuals living within 5km of Kilifi District Hospital\***

| ICD Code | Women          |                         | Men            |                         |
|----------|----------------|-------------------------|----------------|-------------------------|
|          | Admission Rate | 95% Confidence Interval | Admission rate | 95% Confidence Interval |
| A01      | 0.7            | 0.0-15.1                | 0              | N/A                     |
| A05      | 2.2            | 0.1-22.8                | 0.7            | 0.0-17.8                |
| A09      | 57.9           | 31.3-96.1               | 44.4           | 19.9-82.6               |
| A15      | 1              | 0.0-15.1                | 8.7            | 1.2-34.9                |
| A16      | 6.9            | 1.0-29.6                | 3.7            | 0.1-27.0                |
| A19      | 0              | N/A                     | 1.5            | 0.0-17.8                |
| A35      | 5              | 0.1-22.8                | 0.9            | 0.0-17.8                |
| A41      | 3.2            | 0.1-22.8                | 0.7            | 0.0-17.8                |
| A49      | 1.6            | 0.0-15.1                | 3.9            | 0.1-27.0                |
| A82      | 0.9            | 0.0-15.1                | 0              | N/A                     |
| A86      | 0.8            | 0.0-15.1                | 0.9            | 0.0-17.8                |
| B01      | 1.1            | 0.0-15.1                | 0              | N/A                     |
| B02      | 0.9            | 0.0-15.1                | 0              | N/A                     |
| B17      | 2              | 0.0-15.1                | 0              | N/A                     |
| B20-24   | 153.1          | 106.6-208.7             | 69.8           | 37.0-113.6              |
| B37      | 0.7            | 0.0-15.1                | 0              | N/A                     |
| B50      | 21.4           | 6.6-47.7                | 8.7            | 1.2-34.9                |
| B54      | 43.9           | 22.5-80.5               | 25.2           | 7.9-56.4                |
| C00-D48  | 13.2           | 2.5-35.9                | 8.8            | 1.2-34.9                |
| C15      | 2.8            | 0.1-22.8                | 0              | N/A                     |
| C16      | 1.3            | 0.0-15.1                | 5.3            | 0.1-27.0                |
| C18      | 0              | N/A                     | 3.8            | 0.1-27.0                |
| C22      | 1.1            | 0.0-15.1                | 1.4            | 0.0-17.8                |
| C40-C41  | 2.9            | 0.1-22.8                | 0              | N/A                     |
| C41      | 2.7            | 0.1-22.8                | 4.4            | 0.1-27.0                |
| C43      | 3.3            | 0.1-22.8                | 0              | N/A                     |
| C43-C44  | 0              | N/A                     | 0.9            | 0.0-17.8                |
| C50      | 10.7           | 2.5-35.9                | 0              | N/A                     |
| C53      | 25.2           | 9.0-53.4                | 0              | N/A                     |
| C55      | 1.1            | 0.0-15.1                | 0              | N/A                     |
| C56      | 4.8            | 0.1-22.8                | 0              | N/A                     |
| C61      | 0              | N/A                     | 6.8            | 0.1-27.0                |
| C67      | 0              | N/A                     | 2.9            | 0.1-27.0                |
| C71      | 0.7            | 0.0-15.1                | 0              | N/A                     |
| C91-C94  | 0              | N/A                     | 1.8            | 0.0-17.8                |
| D17      | 9              | 1.0-29.6                | 7.4            | 1.2-34.9                |
| D25      | 30             | 11.5-59.0               | 0              | N/A                     |
| D34      | 1.3            | 0.0-15.1                | 0              | N/A                     |
| D39      | 0.7            | 0.0-15.1                | 0              | N/A                     |
| D50      | 2.6            | 0.1-22.8                | 0              | N/A                     |
| D57      | 7.7            | 1.0-29.6                | 12.2           | 3.0-42.4                |
| D63      | 11.9           | 2.5-35.9                | 6              | 0.1-27.0                |
| D64      | 18.1           | 4.5-41.9                | 32.1           | 13.6-69.8               |
| D72      | 1.7            | 0.0-15.1                | 0              | N/A                     |

\* Rates are per 100,000 person-years of observation and are age-standardized

**Supplementary Table 2: Admission rates by ICD code for individuals living within 5km of Kilifi District Hospital\***

|         |      |            |      |            |
|---------|------|------------|------|------------|
| E04     | 3.1  | 0.1-22.8   | 0    | N/A        |
| E05     | 0.7  | 0.0-15.1   | 0    | N/A        |
| E10     | 0    | N/A        | 1.4  | 0.0-17.8   |
| E10-E14 | 97.1 | 62.9-146.1 | 62.3 | 33.5-107.5 |
| E16     | 1.2  | 0.0-15.1   | 1.8  | 0.0-17.8   |
| E24     | 0    | N/A        | 1.1  | 0.0-17.8   |
| E28     | 0.7  | 0.0-15.1   | 0    | N/A        |
| E51     | 0    | N/A        | 0    | N/A        |
| E74     | 0    | N/A        | 0    | N/A        |
| E86     | 0    | N/A        | 0    | N/A        |
| E87     | 0    | N/A        | 0    | N/A        |
| F00-F09 | 1.5  | 0.0-15.1   | 2.7  | 0.1-27.0   |
| F10-F19 | 0.7  | 0.0-15.1   | 2.4  | 0.0-17.8   |
| F20-F29 | 3.4  | 0.1-22.8   | 12.3 | 3.0-42.4   |
| F23     | 15.8 | 4.5-41.9   | 10.5 | 1.2-34.9   |
| F30-F39 | 12.5 | 2.5-35.9   | 6.3  | 0.1-27.0   |
| F40-F48 | 7.6  | 1.0-29.6   | 2.8  | 0.1-27.0   |
| F41     | 0.7  | 0.0-15.1   | 0    | N/A        |
| F43     | 2.1  | 0.1-22.8   | 0    | N/A        |
| G00     | 0.7  | 0.0-15.1   | 3.9  | 0.1-27.0   |
| G03     | 12.7 | 2.5-35.9   | 19.3 | 5.3-49.5   |
| G20-G26 | 0.9  | 0.0-15.1   | 0    | N/A        |
| G40     | 4.4  | 0.1-22.8   | 4.7  | 0.1-27.0   |
| G41     | 0    | N/A        | 1.1  | 0.0-17.8   |
| G43     | 2.7  | 0.1-22.8   | 0    | N/A        |
| G44     | 2.3  | 0.1-22.8   | 1    | 0.0-17.8   |
| G45     | 0    | N/A        | 3.5  | 0.1-27.0   |
| G51     | 0    | N/A        | 0.9  | 0.0-17.8   |
| G81     | 0    | N/A        | 1    | 0.0-17.8   |
| H60-H62 | 0.7  | 0.0-15.1   | 0    | N/A        |
| I05-I09 | 0.8  | 0.0-15.1   | 1.9  | 0.0-17.8   |
| I10     | 30.1 | 11.5-59.0  | 5.4  | 0.1-27.0   |
| I11     | 5.2  | 0.1-22.8   | 4.4  | 0.1-27.0   |
| I15     | 0.7  | 0.0-15.1   | 0    | N/A        |
| I20     | 1.2  | 0.0-15.1   | 0    | N/A        |
| I21     | 7.4  | 1.0-29.6   | 1.1  | 0.0-17.8   |
| I24     | 2    | 0.0-15.1   | 0    | N/A        |
| I38     | 0    | N/A        | 1.7  | 0.0-17.8   |
| I42     | 6.9  | 1.0-29.6   | 6.4  | 0.1-27.0   |
| I48     | 0    | N/A        | 2.9  | 0.1-27.0   |
| I49     | 2    | 0.0-15.1   | 0    | N/A        |
| I50     | 15   | 4.5-41.9   | 31.7 | 13.6-69.8  |
| I64     | 27.8 | 11.5-59.0  | 27.6 | 10.7-63.2  |
| I67     | 1.7  | 0.0-15.1   | 0    | N/A        |
| I71     | 0    | N/A        | 2.8  | 0.1-27.0   |
| I80     | 1.1  | 0.0-15.1   | 0    | N/A        |
| I84     | 1.7  | 0.0-15.1   | 0.8  | 0.0-17.8   |
| I89     | 1.6  | 0.0-15.1   | 0    | N/A        |
| J01     | 1.9  | 0.0-15.1   | 0    | N/A        |

\* Rates are per 100,000 person-years of observation and are age-standardized

**Supplementary Table 2: Admission rates by ICD code for individuals living within 5km of Kilifi District Hospital\***

|         |      |          |      |            |
|---------|------|----------|------|------------|
| J02     | 0.7  | 0.0-15.1 | 0    | N/A        |
| J03     | 3.5  | 0.1-22.8 | 2    | 0.0-17.8   |
| J15     | 3.1  | 0.1-22.8 | 1    | 0.0-17.8   |
| J18     | 25.2 | 9.0-53.4 | 28.8 | 10.7-63.2  |
| J20     | 1.6  | 0.0-15.1 | 0    | N/A        |
| J22     | 15.1 | 4.5-41.9 | 5.6  | 0.1-27.0   |
| J40     | 0.7  | 0.0-15.1 | 0    | N/A        |
| J45     | 14.2 | 2.5-35.9 | 9.6  | 1.2-34.9   |
| J46     | 0    | N/A      | 3.8  | 0.1-27.0   |
| J90-J91 | 2.8  | 0.1-22.8 | 0.9  | 0.0-17.8   |
| J93     | 0    | N/A      | 0.8  | 0.0-17.8   |
| K04     | 0    | N/A      | 1    | 0.0-17.8   |
| K21     | 1    | 0.0-15.1 | 0    | N/A        |
| K25     | 0    | N/A      | 2.7  | 0.1-27.0   |
| K26     | 3.8  | 0.1-22.8 | 0    | N/A        |
| K27     | 22.8 | 9.0-53.4 | 8.1  | 1.2-34.9   |
| K29     | 8.6  | 1.0-29.6 | 6.4  | 0.1-27.0   |
| K30     | 1.7  | 0.0-15.1 | 3.7  | 0.1-27.0   |
| K35     | 12.2 | 2.5-35.9 | 5.8  | 0.1-27.0   |
| K40     | 9    | 1.0-29.6 | 72.5 | 40.6-119.7 |
| K56     | 3.3  | 0.1-22.8 | 2.9  | 0.1-27.0   |
| K60     | 2.8  | 0.1-22.8 | 4.7  | 0.1-27.0   |
| K61     | 0.7  | 0.0-15.1 | 0.9  | 0.0-17.8   |
| K72     | 0.7  | 0.0-15.1 | 0    | N/A        |
| K73     | 0    | N/A      | 2.9  | 0.1-27.0   |
| K80     | 3.3  | 0.1-22.8 | 0    | N/A        |
| L02     | 0.8  | 0.0-15.1 | 0.9  | 0.0-17.8   |
| L03     | 8.6  | 1.0-29.6 | 9.1  | 1.2-34.9   |
| L27     | 0.7  | 0.0-15.1 | 0    | N/A        |
| L50     | 0    | N/A      | 3.9  | 0.1-27.0   |
| L91     | 1    | 0.0-15.1 | 0    | N/A        |
| M00     | 2.4  | 0.1-22.8 | 2    | 0.0-17.8   |
| M05-M06 | 0.7  | 0.0-15.1 | 0    | N/A        |
| M13     | 0    | N/A      | 1.9  | 0.0-17.8   |
| M15     | 1.8  | 0.0-15.1 | 0.7  | 0.0-17.8   |
| M40     | 0.8  | 0.0-15.1 | 0    | N/A        |
| M51     | 0    | N/A      | 0.7  | 0.0-17.8   |
| M54     | 2.7  | 0.1-22.8 | 1.5  | 0.0-17.8   |
| M60     | 2.7  | 0.1-22.8 | 0    | N/A        |
| M67     | 2.4  | 0.1-22.8 | 0    | N/A        |
| M79     | 0.9  | 0.0-15.1 | 1.1  | 0.0-17.8   |
| M80-M82 | 0    | N/A      | 0.7  | 0.0-17.8   |
| M86     | 2    | 0.0-15.1 | 2    | 0.0-17.8   |
| N03     | 0.7  | 0.0-15.1 | 0    | N/A        |
| N04     | 3.1  | 0.1-22.8 | 1.9  | 0.0-17.8   |
| N10     | 0.7  | 0.0-15.1 | 2.6  | 0.1-27.0   |
| N13     | 0.7  | 0.0-15.1 | 0    | N/A        |
| N17     | 4.5  | 0.1-22.8 | 0    | N/A        |
| N18     | 1.7  | 0.0-15.1 | 5.5  | 0.1-27.0   |

\* Rates are per 100,000 person-years of observation and are age-standardized



**Supplementary Table 2: Admission rates by ICD code for individuals living within 5km of Kilifi District Hospital\***

|         |       |             |      |           |
|---------|-------|-------------|------|-----------|
| N20     | 0     | N/A         | 2.1  | 0.0-17.8  |
| N30     | 1.7   | 0.0-15.1    | 3.8  | 0.1-27.0  |
| N34     | 0     | N/A         | 0    | N/A       |
| N39     | 10    | 1.0-29.6    | 3.6  | 0.1-27.0  |
| N40     | 0     | N/A         | 29.4 | 10.7-63.2 |
| N43     | 0     | N/A         | 24.2 | 7.9-56.4  |
| N45     | 0     | N/A         | 0.9  | 0.0-17.8  |
| N62     | 0     | N/A         | 1.4  | 0.0-17.8  |
| N63     | 4.6   | 0.1-22.8    | 0    | N/A       |
| N70     | 9.4   | 1.0-29.6    | 0    | N/A       |
| N73     | 0.8   | 0.0-15.1    | 0    | N/A       |
| N75     | 3.4   | 0.1-22.8    | 0    | N/A       |
| N80     | 2.9   | 0.1-22.8    | 0    | N/A       |
| N81     | 0.9   | 0.0-15.1    | 0    | N/A       |
| N82     | 2.5   | 0.1-22.8    | 0    | N/A       |
| N83     | 7     | 1.0-29.6    | 0    | N/A       |
| N84     | 1.7   | 0.0-15.1    | 0    | N/A       |
| N88     | 6.6   | 1.0-29.6    | 0    | N/A       |
| N92     | 11.6  | 2.5-35.9    | 0    | N/A       |
| N93     | 6.2   | 1.0-29.6    | 0    | N/A       |
| N95     | 1.6   | 0.0-15.1    | 0    | N/A       |
| N97     | 0.8   | 0.0-15.1    | 0    | N/A       |
| NO CODE | 12.8  | 2.5-35.9    | 5.7  | 0.1-27.0  |
| O00     | 5.8   | 0.1-22.8    | 0    | N/A       |
| O01     | 1.5   | 0.0-15.1    | 0    | N/A       |
| O02     | 4.2   | 0.1-22.8    | 0    | N/A       |
| O03     | 157.4 | 110.0-213.4 | 0    | N/A       |
| O05     | 11.6  | 2.5-35.9    | 0    | N/A       |
| O07     | 10.8  | 2.5-35.9    | 0    | N/A       |
| O10-O14 | 2.8   | 0.1-22.8    | 0    | N/A       |
| O15     | 2.4   | 0.1-22.8    | 0    | N/A       |
| O20     | 14.9  | 4.5-41.9    | 0    | N/A       |
| O21     | 7.7   | 1.0-29.6    | 0    | N/A       |
| O72     | 4.6   | 0.1-22.8    | 0    | N/A       |
| O85     | 9.3   | 1.0-29.6    | 0    | N/A       |
| O86     | 2.4   | 0.1-22.8    | 0    | N/A       |
| O99     | 3.9   | 0.1-22.8    | 0    | N/A       |
| P95     | 14    | 2.5-35.9    | 0    | N/A       |
| Q85     | 0.8   | 0.0-15.1    | 0    | N/A       |
| R01     | 0.7   | 0.0-15.1    | 1.1  | 0.0-17.8  |
| R03     | 42.2  | 19.6-75.2   | 26.3 | 7.9-56.4  |
| R04     | 1.1   | 0.0-15.1    | 1.5  | 0.0-17.8  |
| R06     | 0     | N/A         | 0.9  | 0.0-17.8  |
| R09     | 0.7   | 0.0-15.1    | 0    | N/A       |
| R10     | 12.3  | 2.5-35.9    | 12.5 | 3.0-42.4  |
| R15     | 2     | 0.0-15.1    | 2.2  | 0.0-17.8  |
| R18     | 0     | N/A         | 2.9  | 0.1-27.0  |
| R22     | 10.8  | 2.5-35.9    | 5.8  | 0.1-27.0  |
| R33     | 0     | N/A         | 5.7  | 0.1-27.0  |

\* Rates are per 100,000 person-years of observation and are age-standardized

**Supplementary Table 2: Admission rates by ICD code for individuals living within 5km of Kilifi District Hospital\***

|         |      |          |      |          |
|---------|------|----------|------|----------|
| R40     | 2    | 0.0-15.1 | 1.4  | 0.0-17.8 |
| R50     | 1.8  | 0.0-15.1 | 5.4  | 0.1-27.0 |
| R55     | 5.1  | 0.1-22.8 | 0    | N/A      |
| R58     | 0.7  | 0.0-15.1 | 4.1  | 0.1-27.0 |
| R59     | 0.7  | 0.0-15.1 | 0    | N/A      |
| R73     | 12.8 | 2.5-35.9 | 9    | 1.2-34.9 |
| R90     | 0    | N/A      | 0.7  | 0.0-17.8 |
| S00-S09 | 8    | 1.0-29.6 | 7.4  | 1.2-34.9 |
| S00-T98 | 12.6 | 1.0-29.6 | 23.3 | 7.9-56.4 |
| S20-S29 | 2.9  | 0.1-22.8 | 2    | 0.0-17.8 |
| S30-S40 | 0.8  | 0.0-15.1 | 1    | 0.0-17.8 |
| T00-T07 | 5.1  | 0.1-22.8 | 13.7 | 3.0-42.4 |
| T08-T14 | 3.5  | 0.1-22.8 | 19.7 | 5.3-49.5 |
| T09     | 0.8  | 0.0-15.1 | 5.7  | 0.1-27.0 |
| T15-T19 | 2.6  | 0.1-22.8 | 0.9  | 0.0-17.8 |
| T20-T32 | 0.7  | 0.0-15.1 | 2.9  | 0.1-27.0 |
| T36-T50 | 10.4 | 2.5-35.9 | 7.3  | 1.2-34.9 |
| T63     | 17.1 | 4.5-41.9 | 22.1 | 7.9-56.4 |
| T75     | 0.7  | 0.0-15.1 | 0.8  | 0.0-17.8 |
| T78     | 4.2  | 0.1-22.8 | 0    | N/A      |
| T81     | 7.1  | 1.0-29.6 | 19.7 | 5.3-49.5 |
| T83     | 0.7  | 0.0-15.1 | 0    | N/A      |
| V01-V99 | 2.7  | 0.1-22.8 | 9    | 1.2-34.9 |
| X20-X29 | 1    | 0.0-15.1 | 1.1  | 0.0-17.8 |
| X20-Y29 | 3.7  | 0.1-22.8 | 0    | N/A      |
| X24     | 0.7  | 0.0-15.1 | 0    | N/A      |
| X85-Y09 | 3.8  | 0.1-22.8 | 4.4  | 0.1-27.0 |
| Z32     | 4.6  | 0.1-22.8 | 0    | N/A      |

\* Rates are per 100,000 person-years of observation and are age-standardized

**Supplementary Table 3: Disability Adjusted Life Years (DALY) in the KHDSS for the 15 leading causes of admission to KDH**

| <b>Disease</b>               | Men |     | Women |     | DALY/1<br>0 <sup>5</sup> PYO |
|------------------------------|-----|-----|-------|-----|------------------------------|
|                              | YLL | YLD | YLL   | YLD |                              |
| HIV                          | 958 | 35  | 1217  | 60  | 1154                         |
| Stroke                       | 326 | 28  | 284   | 27  | 330                          |
| Meningitis                   | 227 | 22  | 175   | 18  | 217                          |
| Pneumonia                    | 145 | 6   | 173   | 7   | 167                          |
| Diabetes                     | 129 | 13  | 104   | 36  | 141                          |
| Heart failure                | 150 | 15  | 91    | 10  | 129                          |
| Gastroenteritis              | 77  | 0   | 121   | 1   | 103                          |
| Cervical Cancer              | 0   | 0   | 60    | 22  | 82                           |
| Benign prostatic hypertrophy | 32  | 0   | 0     | 0   | 32                           |
| Asthma                       | 0   | 21  | 0     | 32  | 27                           |
| Fractures                    | 37  | 0   | 7     | 0   | 20                           |
| Head Injury                  | 25  | 10  | 0     | 3   | 17                           |
| Inguinal Hernia              | 23  | 1   | 7     | 0   | 15                           |
| Spontaneous abortion         | 0   | 0   | 13    | 0   | 7                            |
| Peptic Ulcer Disease         | 0   | 0   | 7     | 1   | 5                            |

**Footnotes**

1. Years of life lost (YLL), years lived with disability (YLD) and DALY are per 100,000 person years of observation (PYO)
2. Data are for the entire KHDSS
